# Supplementary material for: The Mitochondrial Genome of the Sea Anemone Stichodactyla haddoni Reveals Catalytic Introns, Insertion-Like Element, and Unexpected Phylogeny
Source: MDPI journal article supplement (doi:10.3390/life11050402), 2021-04-28
Supplement: s1 [file s1]

# The Mitochondrial Genome of the Sea Anemone *Stichodactyla haddoni* Reveals Catalytic Introns, Insertion-like Element, and Unexpected Phylogeny

Steinar D. Johansen <sup>1,2,\*</sup>, Sylvia I. Chi <sup>3</sup>, Arseny Dubin <sup>1</sup>, and Tor E. Jørgensen <sup>1</sup>

<sup>1</sup> Faculty of Biosciences and Aquaculture, Nord University, Bodø 8049, Norway; steinar.d.johansen@nord.no (SDJ), aaduu@protonmail.com (AD), tor.e.jorgensen@nord.no (TEJ)

<sup>2</sup> Department of Medical Biology, Faculty of Health Sciences, UiT - The Arctic University of Norway, Tromsø 9037, Norway

<sup>3</sup> Centre for Innovation, Canadian Blood Services, Ottawa, ON K1G 4J5, Canada; sylvia.ighemchi@blood.ca (SIC)

**Figure S1:** Amino acid alignment of orfA protein in *Stichodactyla haddoni* (Sha; 174 aa), *Anthopleura midori* (Ami; 617 aa) and *Urticina eques* (Ueq; 644 aa). See Table S2 for accession numbers. Identical residues are indicated (\*) above aligned sequences.

**Figure S2:** Mitochondrial transcripts from Illumina paired read libraries in *Stichodactyla helianthus* [Rivera-de-Torre et al. 2018] mapped to the *S. haddoni* mitogenome sequence (MW760873). (a) Histograms of estimated normalized read numbers (NGS reads/ kb). See legends to Figures 1 and 6 in the main manuscript for mitochondrial gene abbreviations. (b) Sashimi plot of ND5 splicing junction, consistent with perfect splicing of the ND5-717 intron. 21 reads mapped unambiguously to the ligated sequence region. (c) Sashimi plot of COI splicing junction, consistent with perfect splicing of the COI-884 intron. 100 reads map unambiguously to the ligated sequence region.

**Ref:** Rivera-de-Torre, E.; Martinez-del-Pozo, A.; Garb, J.E. *Stichodactyla helianthus*' de novo transcriptome assembly: discovery of a new actinoporin isoform. *Toxicon* **2018**, *150*, 105-114. doi:10.1016/j.toxicon.2018.05.014.

**Figure S3:** Phylogeny of sea anemones assessed by mitogenome protein sequences. Maximum-likelihood (ML) phylogenetic tree is shown based on alignments of 3,237 amino acid residues derived from concatenated genes. Bootstrap values (%) of 500 replications for alternative phylogenetic inference methods are shown at the internal nodes (ML/NJ/ME). Red filled circles indicate highly significant branch points (bootstrap values of 100%) across the ML, NJ and ME tree construction methods. Members of the Actiniidae family, including *Stichodactyla haddoni* and *Phymanthus crucifer* are marked by a green box. NJ, Neighbor Joining; ME, Minimal evolution.

**Table S1:** Annotation of the complete mitogenome sequence of *S. haddoni*.

**Table S2:** Key features of sea anemone mitogenomes included in this study.

**Figure S1.** Amino acid alignment of orfA protein in *S. haddoni* (Sha), *A. midori* (Ami) and *U. eques* (Ueq).

```

* * * * * * * * * * * * * * * * * * * * * * * *
Ami  MSQALAKNLIKRWLSVIIISYLFIVVKSGGDNFICVKVTLLSLAVLLTHYPWLSFSL
Ueq  MRKLSLRNLIRKKWLGIIISYFVFIVAISGGDNFICVKVTLLSLAILLTHYPWLSFGLL

* * * * * * * * * * * * * * * * * * * * * * * *
Ami  IISVLMNLLKGYLLTIFILFFLIMFRVALYKKVKGIRWLILIIYWSALILMWTGTIVISY
Ueq  IISVLMNLLKGYLLTIFILFFLIMFRVALYKKVKGIWWLILIIYWSAFTLMCAGTIVTFC

* * * * * * * * * * * * * * * * * * * * * * * *
Ami  WGETLFKFLSYNQIGPEPFGLSMSFAQSEASSFKLAPEVWARPSWIYSVGALSIVEGFAQ
Ueq  WGGTFIEYLPFSQVGPEPLGLHGPFQNEAPPFSLAPKVWERPSWVSSVGALSIVEGFAQ

* * * * * * * * * * * * * * * * * * * * * * * *
Ami  TPFENMTYLLEVKGLTGTGFPSSRASLAQVEIDPLISKLESTGLFPFKPSVIENFRGLKDW
Ueq  TPFEDMTYHLDVKGSTTGFPCRASLAQVEIDPLISRLERTGLFPFKPSVIDNFRDLLMDW

* * * * * * * * * * * * * * * * * * * * * * * *
Ami  HCEPLLFLSNFFEAHLSKIALVEEKLQSIGLYQKKLFGLHLYNDWLVLTTYDECTRIGIN
Ueq  HCEPLLFFSNFFDVHLPKALMEEEKCKSIGLYQDTLLGLHLYNDWLVLTTYDECTRIGIN

* * * * * * * * * * * * * * * * * * * * * * * *
Ami  SMTPMGPLDTSQLTDIKIFGSNIKLMFGERQIEIALSNLRETKALGLQELWDNSPPEPFA
Ueq  SMTPTGPLYASQLTDIKAFESNIKLMFGERQIEIALSNLRESKVLGLQELWNNSP&PNF

* * * * * * * * * * * * * * * * * * * * * * * *
Ami  FDNPNFVHGDNLNLHKGPRPNSWLIERFTPPRGSNPFVDSFSQFMGQKVNVIFPLINNGE
Ueq  YYDPVFVHSELDSFRGPRQDTWAIERYTTSPGSNPLVHSFSQFFGKQVQNILIPPMENGE

* * * * * * * * * * * * * * * * * * * * * * * *
Ami  GVLHITLADGSLSPFVEVKVGNTPSSWSPRLELMPERINFVSPRFFMFLTPPTGFFMPT
Ueq  GILDVHFTDGSFLSPFVEVKVGQTPSSWDFKVELWPDITINIVWADHFMFLKPPTGIFMPN
Sha  MFLTPPTGWFECK

* * * * * * * * * * * * * * * * * * * * * * * *
Ami  NQNILDIPLNWVGPPLFYKGVITGNPFDFTDDYDHPGALNLTKKITESNIFHDMSVYQT
Ueq  NGTVFDIPLNCVWGAPLYYKGAIAGNPLNFAADYNHPGALNLIKKVTESNIFHDMSLCQT
Sha  EGTFLDIPINFVWGPPLFYKGVIVGDPFNFVSDYKHPAALGLVKKMTETKIFQEMSLFQR

* * * * * * * * * * * * * * * * * * * * * * * *
Ami  KGQGQGSQGILKNFETFLKNFNKEELAQCQDLPPVIKLPREELFSRGIQPSAAVRLWLY
Ueq  KGQGQGDIGILRNFKTFWKNFNKKELARCNEAHPMIKIPRQELFRMGHIQPMTALKLWLY
Sha  KGEQGQDILKNYKTFKLNFIKKELSRSTVPPFIKIPWKELFLGEYIQPITALKLWLW

* * * *
Ami  -----SLRQQILKSEGSCQVSP
Ueq  RGKLLSPNTSYELARKALSLPKKLFIVQSFRRQILKSGPSSDES
Sha  RGELYSSDTSYGYACKVLGLPKNQFIIRAFRRQIVRSNQIS

```

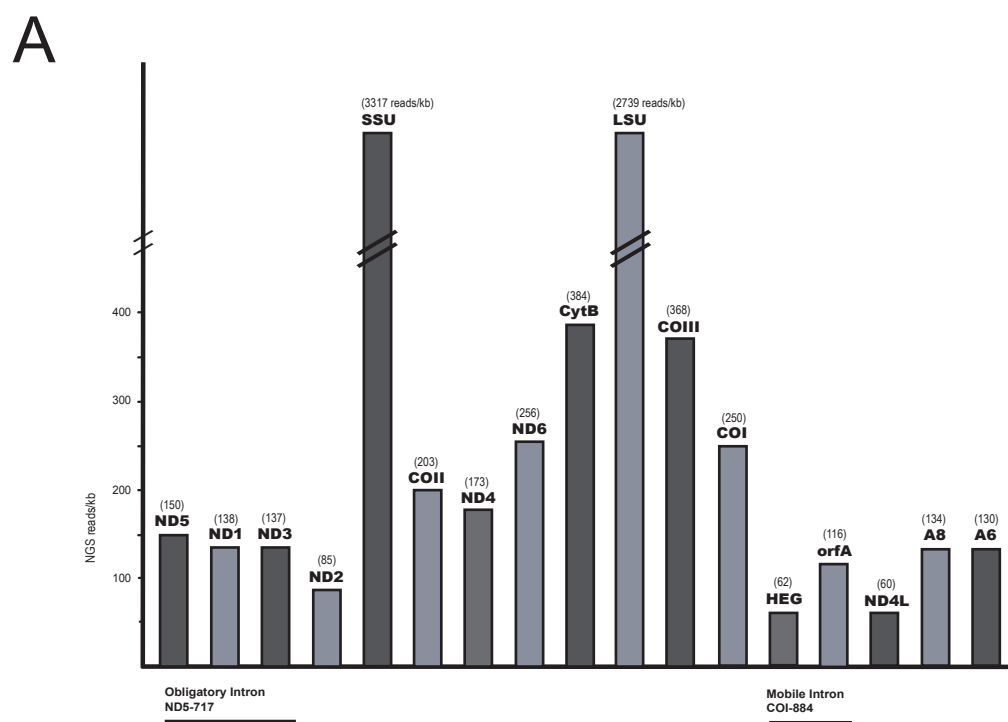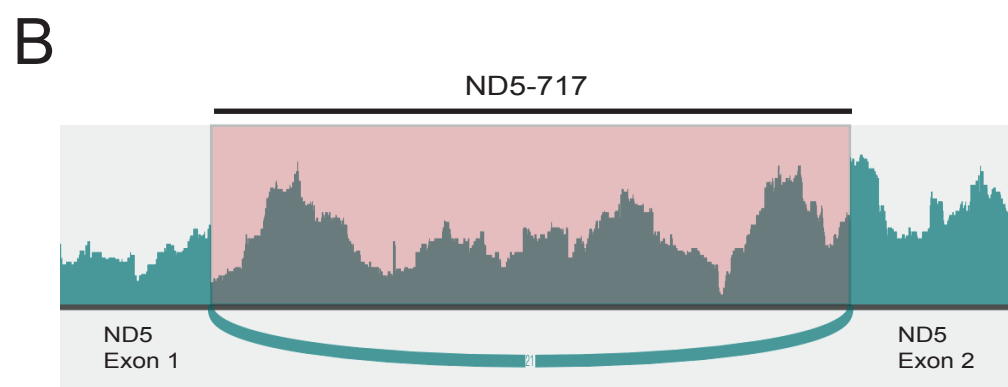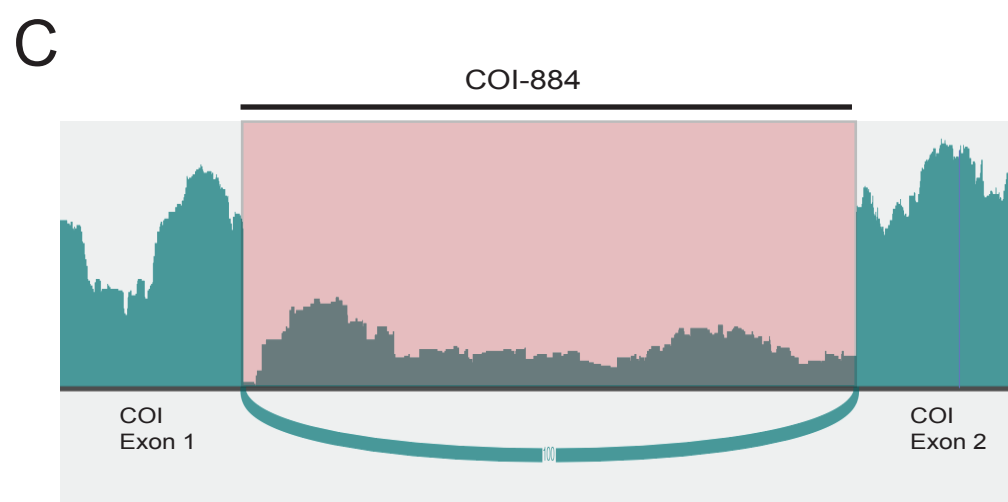

Figure S2

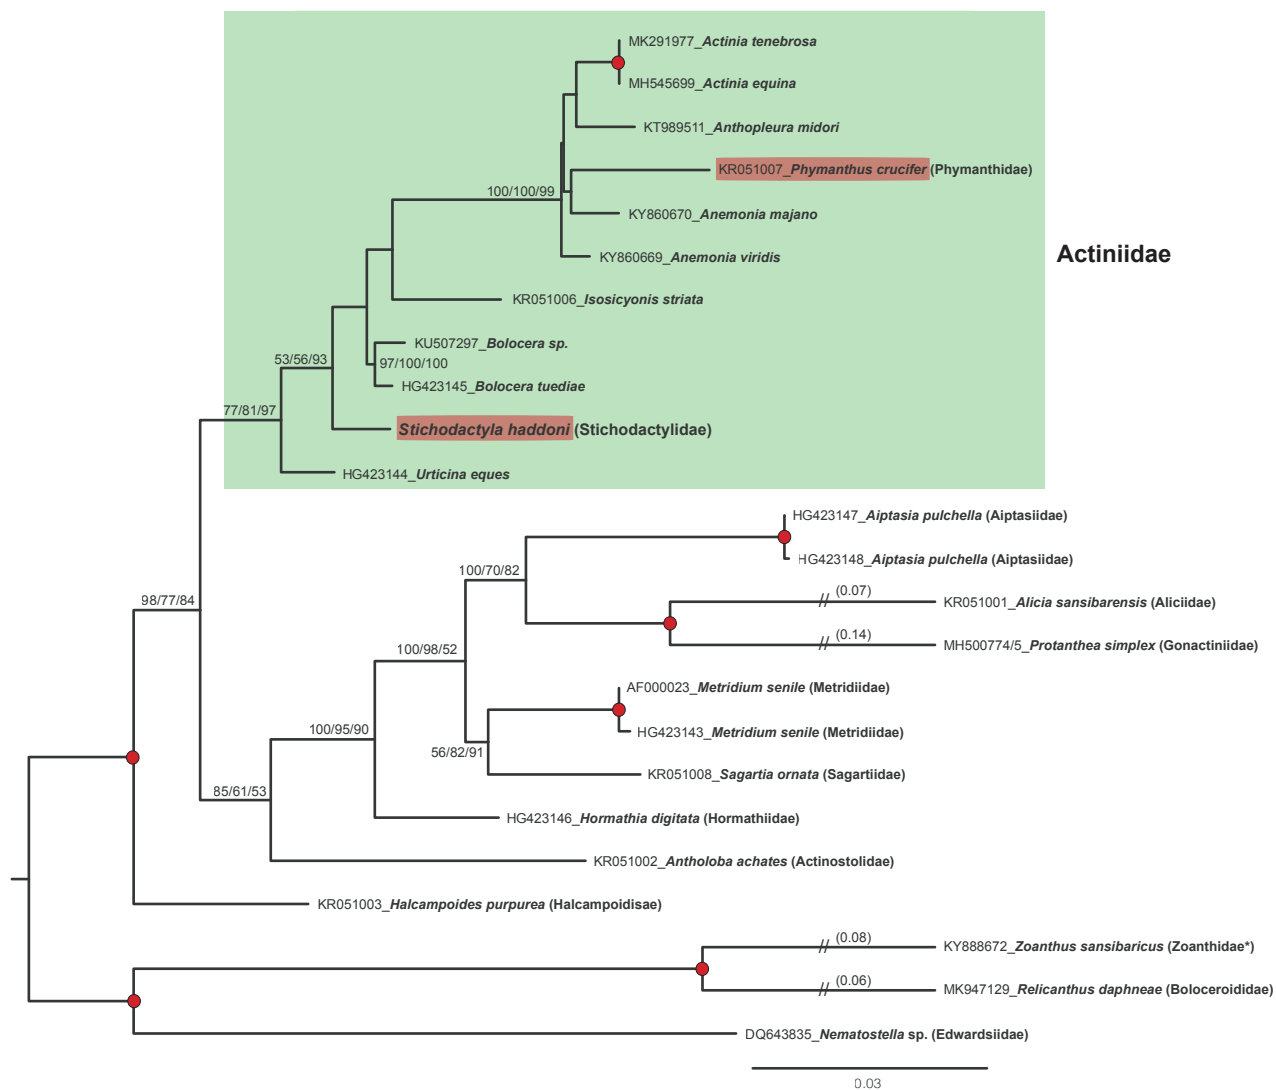

Figure S3

**Table S1: Annotation of *Stichodactyla haddoni* complete mitochondrial genome**

| <b>Genes &amp;<br/>Regions</b> | <b>Pos</b>  | <b>Size nt</b> | <b>Size aa</b> |
|--------------------------------|-------------|----------------|----------------|
| ND5-exon 1                     | 1-717       | 717            | 239            |
| ND5-717, 5' ribozyme           | 718-940     | 223            |                |
| ND1                            | 941-1924    | 984            | 327            |
| IGR-1                          | 1925-1930   | 6              |                |
| ND3                            | 1931-2287   | 357            | 118            |
| ND5-717, 3' ribozyme           | 2288-2397   | 111            |                |
| ND5-exon 2                     | 2398-3513   | 1116           | 371            |
| ND5                            |             | 1833           | 610            |
| IGR-2                          | 3514-3809   | 296            |                |
| W                              | 3810-3879   | 70             |                |
| IGR-3                          | 3380-3993   | 614            |                |
| ND2                            | 3994-5376   | 1383           | 461            |
| IGR-4                          | 5377-5425   | 49             |                |
| SSU                            | 5426-6483   | 1058           |                |
| IGR-5                          | 6484-6535   | 52             |                |
| COII                           | 6536-7282   | 741            | 246            |
| IGR-6                          | 7283-7287   | 5              |                |
| ND4                            | 7288-8763   | 1467           | 488            |
| IGR-7                          | 8764-8767   | 4              |                |
| ND6                            | 8768-9376   | 609            | 202            |
| IGR-8                          | 9377-9403   | 27             |                |
| CytB                           | 9404-10555  | 1152           | 383            |
| IGR-9                          | 10556-11033 | 418            |                |
| M                              | 11034-11104 | 71             |                |
| LSU                            | 11105-13321 | 2248           |                |
| IGR-10                         | 13322-13392 | 71             |                |
| COIII                          | 13393-14181 | 789            | 262            |
| IGR-11                         | 14182-14349 | 176            |                |
| COI-exon 1                     | 14350-15242 | 893            |                |
| Intron COI-884                 | 15243-16107 | 865            |                |
| HEG <sup>1</sup>               | 14350-16095 | 1746           | 581            |
| COI-exon 2                     | 16108-16789 | 682            |                |
| COI                            |             | 1575           | 524            |
| IGR-12                         | 16790-17718 | 285            |                |
| OrfA                           | 17196-17729 | 534            | 177            |
| ND4L                           | 17719-18018 | 300            | 99             |
| IGR-13                         | 18019-18043 | 24             |                |
| A8                             | 18043-18258 | 216            | 71             |
| IGR-14                         | 18259-18290 | 33             |                |
| A6                             | 18291-18980 | 690            | 229            |
| IGR-15                         | 18981-18999 | 19             |                |

<sup>1</sup> Reading frame fused to COI 5' exon

**Table S2.** Key features of sea anemone mitogenomes included in this study**A: Sea anemones (Order Actiniaria)**

| Species                                | Acc.                     | Mt Size   | COI intron | HEG fusion   | orfA       |
|----------------------------------------|--------------------------|-----------|------------|--------------|------------|
| <b>Family Actiniidae</b>               |                          |           |            |              |            |
| <i>Actinia equina</i>                  | MH545699                 | 20,690 bp | COI+       | -            | + (IGR-6)  |
| <i>Actinia tenebrosa</i>               | MK291977                 | 20,691 bp | COI+       | -            | + (IGR-6)  |
| <i>Anemonia majano</i>                 | KY860670                 | 19,545 bp | COI+       | + (pseudo)   | + (IGR-6)  |
| <i>Anemonia viridis</i>                | KY860669                 | 20,108 bp | COI+       | + (pseudo)   | + (IGR-6)  |
| <i>Anthopleura midori</i>              | KT989511                 | 20,039 bp | COI+       | + (pseudo)   | + (IGR-6)  |
| <i>Bolocera tuediae</i>                | HG423145                 | 19,143 bp | COI+       | + (in frame) | -          |
| <i>Bolocera</i> sp.                    | KU507297                 | 19,463 bp | COI+       | + (in frame) | -          |
| <i>Isosicyonis striata</i>             | KR051006                 | 19,001 bp | COI+       | + (in frame) | + (IGR-6)  |
| <i>Urticina eques</i>                  | HG423144                 | 20,458 bp | COI+       | + (in frame) | + (IGR-6)  |
| <b>Family Actinostolidae</b>           |                          |           |            |              |            |
| <i>Antholoba achates</i>               | KR051002                 | 17,816 bp | COI+       | + (in frame) | + (IGR-6)  |
| <b>Family Aiptasiidae</b>              |                          |           |            |              |            |
| <i>Aiptasia pulchella</i> <sup>4</sup> | HG423147                 | 19,791 bp | COI+       | -            | + (IGR-6)  |
| <i>Aiptasia pulchella</i> <sup>4</sup> | HG423148                 | 19,790 bp | COI+       | -            | + (IGR-6)  |
| <b>Family Aliciidae</b>                |                          |           |            |              |            |
| <i>Alicia sansibarensis</i>            | KR051001                 | 19,575 bp | COI-       | -            | -          |
| <b>Family Boloceroididae</b>           |                          |           |            |              |            |
| <i>Relicanthus daphneae</i>            | MK947129                 | 17,727 bp | COI+       | + (in frame) | -          |
| <b>Family Edwardsiidae</b>             |                          |           |            |              |            |
| <i>Nematostella</i> sp.                | DQ643835                 | 16,389 bp | COI-       | -            | -          |
| <b>Family Gonactiniidae</b>            |                          |           |            |              |            |
| <i>Protanthea simplex</i>              | MH500774/75              | 21,326 bp | COI-       | -            | -          |
| <b>Family Halcampoidisae</b>           |                          |           |            |              |            |
| <i>Halcampoides purpurea</i>           | KR051003                 | 18,038 bp | COI+       | -            | -          |
| <b>Family Hormathiidae</b>             |                          |           |            |              |            |
| <i>Hormathia digitata</i>              | HG423146                 | 18,754 bp | COI+       | -            | + (IGR-6)  |
| <b>Family Metridiidae</b>              |                          |           |            |              |            |
| <i>Metridium senile</i>                | HG423143                 | 17,444 bp | COI+       | -            | -          |
| <i>Metridium senile</i>                | AF000023                 | 17,743 bp | COI+       | -            | -          |
| <b>Family Phymanthidae</b>             |                          |           |            |              |            |
| <i>Phymanthus crucifer</i>             | KR051007                 | 19,727 bp | COI+       | -            | + (IGR-6)  |
| <b>Family Sagartiidae</b>              |                          |           |            |              |            |
| <i>Sagartia omata</i>                  | KR051008                 | 17,446 bp | COI+       | -            | -          |
| <b>Family Stichodactylidae</b>         |                          |           |            |              |            |
| <i>Stichodactyla haddoni</i>           | Unpublished <sup>5</sup> | 18,999 bp | COI+       | + (in frame) | + (IGR-12) |

**B: Colonial anemones (Order Zoantharia)**

| Species                      | Acc. no  | Mt Size   | COI intron | HEG fusion | orfA |
|------------------------------|----------|-----------|------------|------------|------|
| <b>Family Zoanthidae</b>     |          |           |            |            |      |
| <i>Zoanthus sansibaricus</i> | KY888672 | 20,972 bp | COI+       | -          | -    |

Notes: 1) COI+ or -, COI intron present or absent. 4) The sea anemone *Aiptasia pulchella* may also be annotated as *Exaiptasia pallida*. 5 Information from our unpublished complete mitochondrial genome sequence of *Stichodactyla haddoni*.
